# Supplementary material for: Expression of Pumpkin CmbHLH87 Gene Improves Powdery Mildew Resistance in Tobacco
Source: PubMed Central journal article supplement (PMC7147351; doi:10.3389/fpls.2020.00163), 2020-04-03
Supplement: Image_2.pdf [file Image_2.pdf]

|                  |                                                                                                                                                                                                |     |
|------------------|------------------------------------------------------------------------------------------------------------------------------------------------------------------------------------------------|-----|
| bHLH87-RIFU      | <u>MDHL</u> <u>SWDGYGSRATTNT</u> <u>PPPS</u> SS..SFWSNYQQGHEQRFEMISNNNSNPNFFNSVQDLF..                                                                                                          | 56  |
| bHLH87-C. pepo   | <u>MDHL</u> <u>SWDGYGSRATTNT</u> <u>PPPS</u> SS..SFWSNFQQGHEQRFMMSSNNSNPNFFNSVQDLF..                                                                                                           | 56  |
| bHLH87-C. maxima | <u>MDHL</u> <u>SWDGYGSRATTNT</u> <u>PPPS</u> SSLSFSWSNYQQGHEQRFMISNNNSNPNFFNSVQDLF..                                                                                                           | 58  |
| bHLH87-C. melo   | <u>MDHL</u> <u>NWNGYGSRVAKKTT</u> <u>ASTT</u> SSSSFSWSNYQQGVEERFEMISNNNSNPNFFNSVQDLF..                                                                                                         | 59  |
| bHLH87-C. sativu | <u>MDHL</u> <u>NWNGYGSRVAKKTT</u> <u>ASTT</u> SSSSFSWSNYQQGVEERFVIVSSNNSNPNFFNSVQDLF..                                                                                                         | 59  |
| bHLH87-N. tabacu | ME <del>SL</del> NWD..ESVVFQEFGASFDPIHVISNWNMPQRQEA <del>AV</del> RLAADS.MAAKS <del>AAD</del> LSRD                                                                                             | 56  |
| AtbHLH087-A. tha | MEGL <del>ES</del> VY..AQA <del>MY</del> GMTRE <del>SK</del> IMEHOGSDLIWGGNE <del>LM</del> ARELCS <del>SS</del> .SYHHQ <del>LI</del> NP..                                                      | 55  |
| CmbHLH87-112-2   | <u>MDHL</u> <u>SWDGYGSRATTNT</u> <u>PPPS</u> SS..SFWSNYQQGHEQRFEMISNNNSNPNFFNSVQDLF..                                                                                                          | 56  |
| Consensus        | m l s s                                                                                                                                                                                        |     |
|                  |                                                                                                                                                                                                |     |
| bHLH87-RIFU      | .....TSM <del>MD</del> VVGL <del>ET</del> QL <del>LT</del> SFNGDKTATATAAT...C                                                                                                                  | 86  |
| bHLH87-C. pepo   | .....TSM <del>MD</del> VVGL <del>ET</del> QL <del>LP</del> SFNGDKTATATAATAATC                                                                                                                  | 89  |
| bHLH87-C. maxima | .....TSM <del>MD</del> VVGL <del>ET</del> QL <del>LT</del> SFNGDKTATATTTAAT...C                                                                                                                | 88  |
| bHLH87-C. melo   | VAENSSTPVLKTEDPLVMSPLTSTFTTSSNM <del>MD</del> VVGL <del>EL</del> SQ <del>LD</del> HGSGNGDKSATVTCS...                                                                                           | 115 |
| bHLH87-C. sativu | VAANSSTPVLKTENPLAMSPSLTSTFTTSSNM <del>MD</del> VVGL <del>LS</del> Q <del>LD</del> AGSNGDKSATVTCS...                                                                                            | 115 |
| bHLH87-N. tabacu | CAENGFSSSPIINMPNYIS.....DSNEMALNGIMADFSNNGVQVEIKPAPKLLSNAC                                                                                                                                     | 109 |
| AtbHLH087-A. tha | .....LSSCFMSD <del>LG</del> V <del>LG</del> EIQQQH <del>VGN</del> RASSIDPS...C                                                                                                                 | 86  |
| CmbHLH87-112-2   | .....TSSM <del>MD</del> VVGL <del>ET</del> QL <del>LT</del> SFNGDKTATATAATAATC                                                                                                                 | 89  |
| Consensus        | m g                                                                                                                                                                                            |     |
|                  |                                                                                                                                                                                                |     |
| bHLH87-RIFU      | <u>SLES</u> LDCLLSATN...SNTDTSIEDDGSVSMMLSDYTNLWNFGGNAAP..SSK.....                                                                                                                             | 134 |
| bHLH87-C. pepo   | <u>SLES</u> LDCLLSATN...SNTDTSIEDDGSVSMMLSDYTNLWNFGGNAAP..SSK.....                                                                                                                             | 137 |
| bHLH87-C. maxima | <u>SLES</u> LDCLLSATN...SNTDTSIEDDGSVSMMLSDYTNLWNFGGNAAB..SSK.....                                                                                                                             | 136 |
| bHLH87-C. melo   | .LES <del>LD</del> CLLSATN...SNTDTSV <del>ED</del> DDGSVSMMLTDYTNLWNFGGNAAV..SSKESEKNG..                                                                                                       | 168 |
| bHLH87-C. sativu | .LES <del>LD</del> CLLSATN...SNTDTSV <del>ED</del> DDGSVSMMLTDYTNLWNFGGNAAV..SSKESEKNG..                                                                                                       | 168 |
| bHLH87-N. tabacu | <u>SLES</u> LDCLLSATITTTNTTSDIEDDGM <del>S</del> MFV <del>DN</del> SKGLWNFNSSSEHNASSEALKQSLGY                                                                                                  | 169 |
| AtbHLH087-A. tha | ...SLDCLLSATS...NSNNTSTEDDEGISVLFSDCQTLW <del>SF</del> GGVSSAESENREITTTT                                                                                                                       | 141 |
| CmbHLH87-112-2   | <u>SLES</u> LDCLLSATN...SNTDTSIEDDGSVSMMLSDYTNLWNFGGNAAP..SSK.....                                                                                                                             | 137 |
| Consensus        | sldcllsat ts edd lw f                                                                                                                                                                          |     |
|                  |                                                                                                                                                                                                |     |
| bHLH87-RIFU      | .....RSHDQTHIKPTEYSVFS                                                                                                                                                                         | 151 |
| bHLH87-C. pepo   | .....RSHDQTHIKPTEYSVFS                                                                                                                                                                         | 154 |
| bHLH87-C. maxima | .....RSHDQTHIKPTEYSVFS                                                                                                                                                                         | 153 |
| bHLH87-C. melo   | .....SNSTKRSHEQTQFKAADYSIFS                                                                                                                                                                    | 190 |
| bHLH87-C. sativu | .....SNSTKRSHEQTQFKAADYSIFS                                                                                                                                                                    | 190 |
| bHLH87-N. tabacu | QQLLTCHESGHKILQE <del>EER</del> KRKYKPINANELDETVSQSSPNKY <del>N</del> KRS <del>HN</del> QTL <del>EN</del> S <del>P</del> SE                                                                    | 229 |
| AtbHLH087-A. tha | TIKP.....KPLKRN <del>RG</del> GGGTETTTTTTKPKSLK <del>RN</del> RGDE <del>T</del> GS                                                                                                             | 181 |
| CmbHLH87-112-2   | .....RSHDQTHIKPTEYSVFS                                                                                                                                                                         | 154 |
| Consensus        |                                                                                                                                                                                                |     |
|                  |                                                                                                                                                                                                |     |
| bHLH87-RIFU      | NNIITLSDSTSNSEGF <del>II</del> TDQNL <del>PK</del> OKKPR.....SEKPPN <del>SS</del> NI <del>NF</del> Q <del>Q</del> SCSSGSSCI                                                                    | 205 |
| bHLH87-C. pepo   | NNIITLSDSTSNSEGF <del>II</del> TDQNL <del>PK</del> OKKPR.....SEKPPN <del>SS</del> NI <del>NF</del> Q <del>Q</del> SCSSGSSCI                                                                    | 208 |
| bHLH87-C. maxima | NNIITLSDSTSNSEGF <del>II</del> TDQNL <del>PK</del> OKKPR.....SEKPPN <del>SS</del> NI <del>NF</del> Q <del>Q</del> SCSSGSSCI                                                                    | 207 |
| bHLH87-C. melo   | NNIINLSDSTSDSGGFRIT <del>TD</del> HNL <del>PK</del> OKKPR.....SEKPPS <del>SS</del> NI <del>NF</del> Q <del>Q</del> SCSSGSSCI                                                                   | 244 |
| bHLH87-C. sativu | NNIINLSDSTSDSGGFRIT <del>TD</del> HNL <del>PK</del> OKKPR.....SEKPPS <del>SS</del> NI <del>NF</del> Q <del>Q</del> SCSSGSSCI                                                                   | 244 |
| bHLH87-N. tabacu | FNL <del>F</del> ESDSLNGDCGN <del>F</del> OLI <del>SE</del> K.QSK <del>KK</del> PR <del>LI</del> AENY <del>N</del> KSR <del>TI</del> SSNI <del>NF</del> Q <del>Q</del> ASS <del>SS</del> .VSSI | 287 |
| AtbHLH087-A. tha | HFSLVHPQ <del>DD</del> SEKGG <del>KL</del> IY <del>DE</del> NQSK <del>KK</del> PR.....TEKERGGSSNI <del>SF</del> Q <del>H</del> STCL...SD                                                       | 233 |
| CmbHLH87-112-2   | NNIITLSDSTSNSEGF <del>II</del> TDQNL <del>PK</del> OKKPR.....SEKPPN <del>SS</del> NI <del>NF</del> Q <del>Q</del> SCSSGSSCI                                                                    | 208 |
| Consensus        | f i k kkpr ssnifq                                                                                                                                                                              |     |
|                  |                                                                                                                                                                                                |     |
| bHLH87-RIFU      | DQEPDEAIAQMKEMIYRAAAF <del>RPV</del> NGLEAIEKPKRKNV <del>RI</del> STDPQTVAARQRRERISE                                                                                                           | 265 |
| bHLH87-C. pepo   | DQEPDEAIAQMKEMIYRAAAF <del>RPV</del> NGLEAIEKPKRKNV <del>RI</del> STDPQTVAARQRRERISE                                                                                                           | 268 |
| bHLH87-C. maxima | DQEPDEAIAQMKEMIYRAAAF <del>RPV</del> NGLETIEKPKRKNV <del>RI</del> STDPQTVAARQRRERISE                                                                                                           | 267 |
| bHLH87-C. melo   | DQEPDEAIAQMKEMIYRAAAF <del>RPV</del> NGLEMIIEKPKRKNV <del>RI</del> STDPQTVAARQRRERISE                                                                                                          | 304 |
| bHLH87-C. sativu | DQEPDEAIAQMKEMIYRAAAF <del>RPV</del> NGLEMIIEKPKRKNV <del>RI</del> SSDPQTVAARQRRERISE                                                                                                          | 304 |
| bHLH87-N. tabacu | DQEPDEAIAQMKEMIYRAAAF <del>RPV</del> NGPDAIEKPKRKNV <del>RI</del> STDPQTVAARQRRERISE                                                                                                           | 347 |
| AtbHLH087-A. tha | NVEPDAEIAQMKEMIYRAAAF <del>RPV</del> NGLEIVIEKPKRKNV <del>RI</del> STDPQTVAARQRRERISE                                                                                                          | 293 |
| CmbHLH87-112-2   | DQEPDEAIAQMKEMIYRAAAF <del>RPV</del> NGLEAIEKPKRKNV <del>RI</del> STDPQTVAARQRRERISE                                                                                                           | 268 |
| Consensus        | epd ealaqmkiyraaafipvn g e ekpkrknv is dpqtvaarqrrerise                                                                                                                                        |     |
|                  |                                                                                                                                                                                                |     |
| bHLH87-RIFU      | FIRVLQRIVPGGSKMDTASMLDEAANYL <del>KFL</del> KSQIKALENLGOKIESLNCPSNTIAFSFN                                                                                                                      | 325 |
| bHLH87-C. pepo   | FIRVLQRIVPGGSKMDTASMLDEAANYL <del>KFL</del> KSQIKALENLGOKIESLNCPSNTIAFSFN                                                                                                                      | 328 |
| bHLH87-C. maxima | FIRVLQRIVPGGSKMDTASMLDEAANYL <del>KFL</del> KSQIKALENLGOKIESLNCPSNSTIAFSFN                                                                                                                     | 327 |
| bHLH87-C. melo   | FIRVLQRIVPGGSKMDTASMLDEAANYL <del>KFL</del> KSQIKALENLGOKIESLNCPSNTIAFSFN                                                                                                                      | 364 |
| bHLH87-C. sativu | FIRVLQRIVPGGSKMDTASMLDEAANYL <del>KFL</del> KSQIKALENLGOKIESLNCPSNTIAFSFN                                                                                                                      | 364 |
| bHLH87-N. tabacu | FIRVLQRIVPGGSKMDTASMLDEAANYL <del>KFL</del> RSQV <del>EA</del> LEAIGQ <del>QD</del> ....EFSSIQFNY.                                                                                             | 402 |
| AtbHLH087-A. tha | KIRVLCTLVPGGCKMDTASMLDEAANYL <del>KFL</del> RAQV <del>KA</del> LENL <del>R</del> PKLD....QTNL <del>S</del> FSSA                                                                                | 348 |
| CmbHLH87-112-2   | FIRVLQRIVPGGSKMDTASMLDEAANYL <del>KFL</del> KSQIKALENLGOKIESLNCPSNTIAFSFN                                                                                                                      | 328 |
| Consensus        | irvlq vpgg kmdtasmldeaanylkfl q ale k f                                                                                                                                                        |     |
|                  |                                                                                                                                                                                                |     |
| bHLH87-RIFU      | P.SFPPIQTSSSSSHNNFSLQNPYDQLM.....                                                                                                                                                              | 352 |
| bHLH87-C. pepo   | P.SFPPIQTSSSSSHNNFSLQNPYDQLM.....                                                                                                                                                              | 355 |
| bHLH87-C. maxima | P.SFPPIQTSSSSSHNNFSLQNPYDQLM.....                                                                                                                                                              | 354 |
| bHLH87-C. melo   | P.SFPPIQTSS...SHNNFTLLNPNH <del>LI</del> NQYPQN                                                                                                                                                | 393 |
| bHLH87-C. sativu | P.SFPPIQTSS...SHNNFTLLNPNH <del>LI</del> NQYPQN                                                                                                                                                | 393 |
| bHLH87-N. tabacu | ..PFP <del>ML</del> PH.....FPV <del>Q</del> NP <del>PI</del> HGPKS..                                                                                                                           | 424 |
| AtbHLH087-A. tha | PTS <del>F</del> PL <del>F</del> HS.....FL <del>PL</del> QNP <del>Q</del> IHHPEC..                                                                                                             | 373 |
| CmbHLH87-112-2   | P.SFPPIQTSSSSSHNNFSLQNPYDQLM.....                                                                                                                                                              | 355 |
| Consensus        | fp np                                                                                                                                                                                          |     |

FIGURE S2 Amino acid sequences alignment of pumpkin CmbHLH87 with others. The conserved domains (bHLH) are shown by thin underlines. The genes included are

bHLH87-like (*C. moschata* cv. 'Rifu', XP\_022953326.1), bHLH87-like (*C. pepo*, XP\_023547764.1), bHLH87-like (*C. maxima*, XP\_022992322.1), bHLH87-like (*C. melo*, XP\_008462383.1), bHLH87-like (*C. sativus*, XP\_004141799.1), bHLH87-like (*Nicotiana tabacum*, XP\_016504990.1), AtbHLH087 (*Arabidopsis*, AAM10960.1) and CmbHLH87 (*C. moschata* cv. '112- 2', MH105822).
